# Supplementary material for: Synthesis and electrochemical study of sodium ion transport polymer gel electrolytes
Source: Royal Society of Chemistry journal article supplement (doi:10.1039/c5ra23864a), 2016-01-01
Supplement: c5ra23864a1.pdf [file c5ra23864a1.pdf]

## **Electronic Supplementary Information for Synthesis and Electrochemical Study of Sodium Ion Transport Polymer Gel Electrolytes**

Yuan Xue and David J. Quesnel†  
Materials Science Program  
Mechanical Engineering Department  
University of Rochester  
Rochester, NY 14627  
USA

†Corresponding author. Tel.: +1 585 275 5215; fax: +1 585 256 2509  
E-mail Address: david.quesnel@rochester.edu

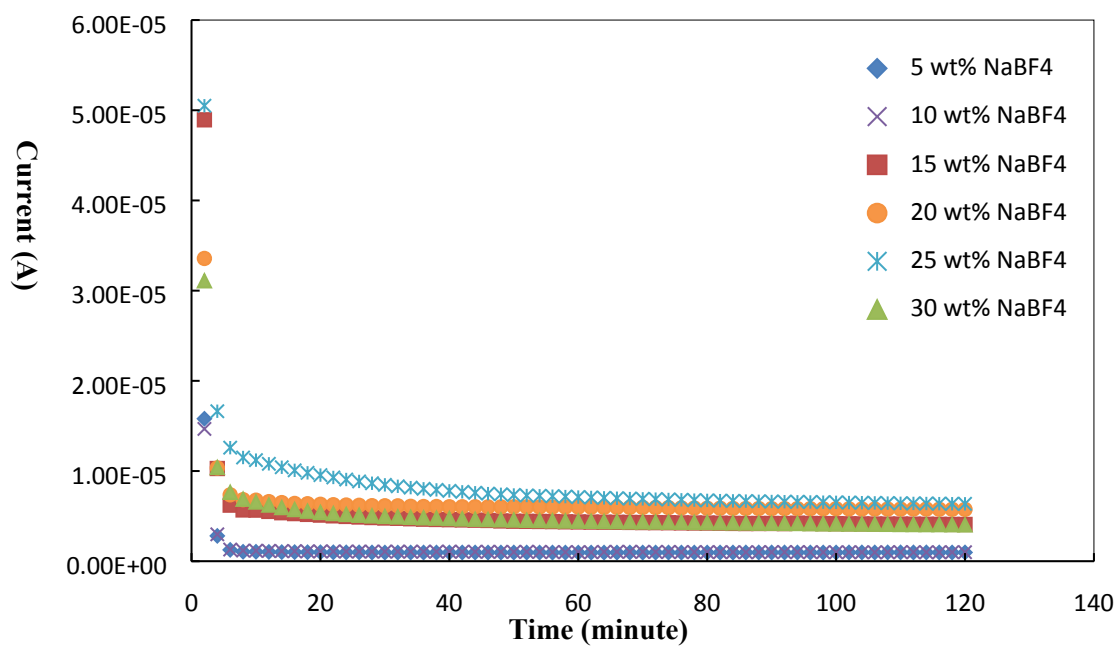

Figure 1. Transference number measurements of polarization current versus time of PGEs with different amount of NaBF<sub>4</sub>.
